# Supplementary material
Source: PubMed Central journal article supplement (PMC4545489)
Supplement: NIHMS712930-supplement-Supp_AppendixS1.pdf [file NIHMS712930-supplement-Supp_AppendixS1.pdf]

# Ache Questionnaire

ID \_\_\_\_\_

---

---

## DEMOGRAPHIC INFORMATION

Account \_\_\_\_\_

MRN \_\_\_\_\_

Patient Name \_\_\_\_\_

Date of Birth \_\_\_\_\_

Admit Date \_\_\_\_\_

Discharge Date \_\_\_\_\_

LOS \_\_\_\_\_

Discharge Status \_\_\_\_\_

PAC Agency \_\_\_\_\_

Gender  Female  Male

Chart reviewer  Melissa Loh  Sheryl Ramdass

Service  Medical  Surgical

---

---

## ANTIPSYCHOTICS USAGE Indications

- Indications for antipsychotics initiation during hospitalization
- Delirium
  - Hallucinations
  - Insomnia
  - Anxiety
  - Alcohol withdrawal
  - Not documented
  - Others

---

---

## TYPES OF ATYPICAL ANTIPSYCHOTICS

Types of atypical antipsychotics

- Quetiapine (Seroquel)  
 Aripiprazole (Abilify)  
 Olanzapine (Zyprexa)  
 Risperidone (Risperdal)  
 Ziprasidone (Geodon, Zeldox)  
 Amisulpride (Solian)  
 Asenapine (Saphris)  
 Caripramine (Prazinil)  
 Clozapine (Clozaril)  
 Clotiapine (Entumine)  
 Clozapine (Clozaril)  
 Iloperidone (Fanapt)  
 Lurasidone (Latuda)  
 Mosapramine (Cremin)  
 Paliperidone (Invega)  
 Perospirone (Lullan)  
 Remoxipride (Roxiam)  
 Sertindole (Serdolect)  
 Sulpiride (Sulpirid, Eglonyl)  
 Blonanserin (Lonasen)  
 Zotepine (Nipolept)

**ATYPICAL ANTIPSYCHOTICS 1**

Route of administration for atypicals

- 
- Parenteral
- 
- Enteral

Time during hospitalization antipsychotics were started (day after admission)

\_\_\_\_\_

Time during hospitalization antipsychotics were discontinued (day after admission)

\_\_\_\_\_

Duration of antipsychotics use (days)

\_\_\_\_\_

Was antipsychotics continued on discharge

- 
- Yes
- 
- No

Was antipsychotics on discharge scheduled or as needed

- 
- Scheduled
- 
- As needed

**ATYPICAL ANTIPSYCHOTICS 2**

Route of administration for atypicals

- 
- Parenteral
- 
- Enteral

Time during hospitalization antipsychotics were started (day after admission)

\_\_\_\_\_

Time during hospitalization antipsychotics were discontinued (day after admission)

\_\_\_\_\_

Duration of antipsychotics use (days)

\_\_\_\_\_

Was antipsychotics continued on discharge

- 
- Yes
- 
- No

Was antipsychotics on discharge scheduled or as needed

- 
- Scheduled
- 
- As needed

---



---

**TYPES OF TYPICAL ANTIPSYCHOTICS**

Types of typical antipsychotics

- Haloperidol (Haldol, Serenace)  
 Chlorpromazine (Largactil, Thorazine)  
 Chlorprothixene (Truxal)  
 Droperidol  
 Flupentixol (Depixol)  
 Fluphenazine (Prolixin)  
 Levomepromazine  
 Loxapine (Loxapac, Loxitane)  
 Mesoridazine  
 Molindone (Moban)  
 Thioridazine (Mellaril)  
 Thiothixene (Navane)  
 Trifluoperazine (Stelazine)  
 Perphenazine (Trilafon)  
 Zuclopenthixol (Clopixol)

---



---

**TYPICAL ANTIPSYCHOTIC**

Route of administration for typicals

- 
- Parenteral
- 
- Enteral

Time during hospitalization antipsychotics were started (day after admission)

\_\_\_\_\_

Time during hospitalization antipsychotics were discontinued (day after admission)

\_\_\_\_\_

Duration of antipsychotics use (days)

\_\_\_\_\_

Was antipsychotics continued on discharge

- 
- Yes
- 
- No

Was antipsychotics on discharge scheduled or as needed

- 
- Scheduled
- 
- As needed

---



---

**AMOUNT OF ANTIPSYCHOTICS**

Number of different typical antipsychotics use

\_\_\_\_\_

Number of different atypical antipsychotics use

\_\_\_\_\_

---



---

**MONITORING**

Was EKG performed before drug administration?

- 
- Yes
- 
- No

Was QTc &gt; 500?

- 
- Yes
- 
- No

Presence of QTc prolongation (QTc&gt;450 ms in male, &gt;470ms in female)

- 
- Yes
- 
- No

Was EKG performed after drug administration?

- 
- Yes
- 
- No

Was QTc &gt; 500?

- 
- Yes
- 
- No

Presence of QTc prolongation (QTc&gt;450 ms in male, &gt;470ms in female)

- 
- Yes
- 
- No

---

---

**DELIRIUM**Documented delirium  Yes  NoEvidence of tool to assess delirium (CAM)  Yes  No

---

---

**DEMENTIA**Presence of dementia  Yes  No

---

---

**ALTERNATIVE RESTRAINT METHODS**Physical restraints during hospitalization (including ICU)  Yes  No

---

---

**GERIATRICS INVOLVEMENT**Presence of geriatrics consult  Yes  NoPresence of geriatrics recommendation  Yes  No

---

---

**GEROPSYCHIATRY INVOLVEMENT**Presence of geropsychiatric consult  Yes  NoPresence of geropsychiatry recommendation  Yes  No

---

---

**ADMISSION CIRCUMSTANCES**Admission from SNF  Yes  No

---

---

**DISCHARGE CIRCUMSTANCES**Discharge disposition  Home  
 Short-term rehab  
 Long-term rehab  
 Nursing home (SNF)Expired  Yes  NoPlan to discharge to skilled nursing facility  Yes  NoReasons for exclusion  On antipsychotics prior to admission  
 Only received 1 dose of oral AP  
 Only received intravenous AP  
 Psychiatric admission

Other reasons for exclusion \_\_\_\_\_

Comments \_\_\_\_\_
